# Supplementary material for: No Significant Difference between Plasma miRNAs and Plasma-Derived Exosomal miRNAs from Healthy People
Source: Hindawi journal article supplement (doi:10.1155/2017/1304816), 2017-01-01
Supplement: f1 [file 1304816.f1.pdf]

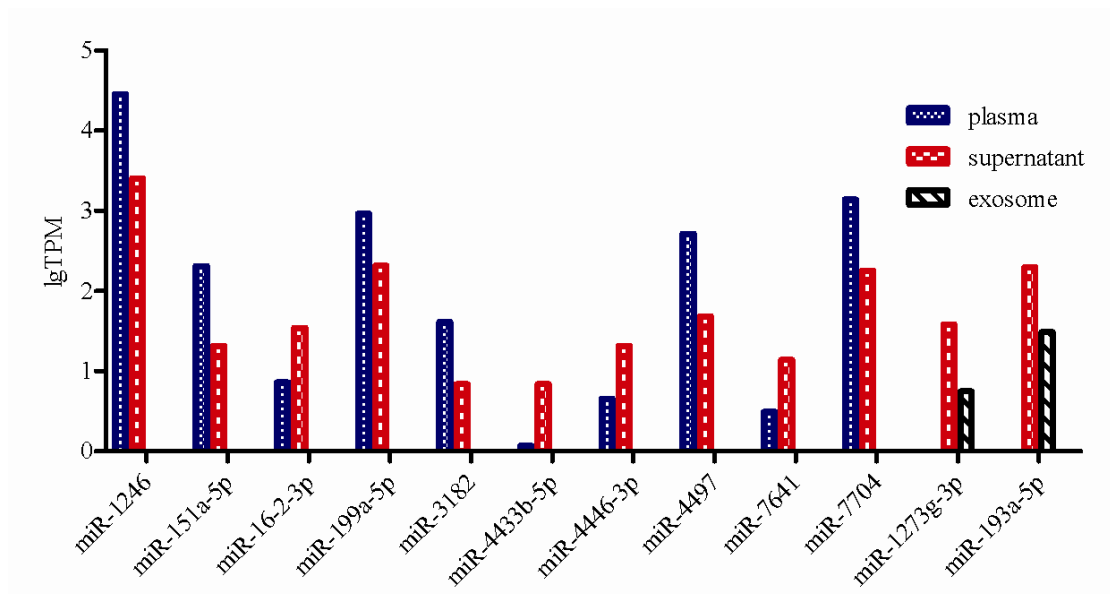

Supplemental Figure1 The 12 differential miRNAs in the supernatant compared to plasma or exosome in the healthy group by sequencing. The y-axis meant the value of TPM as log10. Ten miRNAs (6 up-regulated, 4 down-regulated) had significant differences between plasma and supernatant, and two miRNAs (up-regulated) were different in exosome compared to supernatant (p-value<0.05).

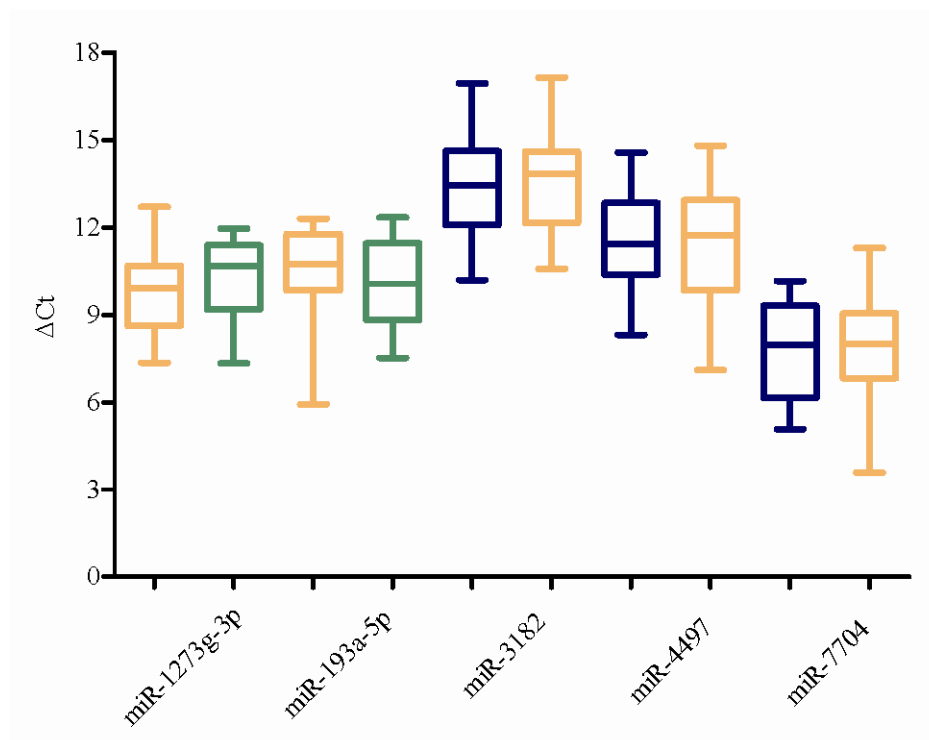

Supplemental Figure2 The quantification results of 5 supernatant miRNAs in the healthy samples. The supernatant miRNAs (yellow) did not have the differences when compared to plasma (blue) or exosome (green). The y-axis meant the value of  $\Delta Ct = AvgCt_{miRNA} - AvgCt_{U6}$ .

Supplemental Table1 The primer sequence used in the qRT-PCR assay

| Primer Name      | Sequence (5'-3')                                     |
|------------------|------------------------------------------------------|
| let-7a-5p RTP    | GTCGTATCCAGTGCAGGGTCCGAGGTATTTCGCACTGGATACGACAACATAT |
| miR-125a-5p RTP  | GTCGTATCCAGTGCAGGGTCCGAGGTATTTCGCACTGGATACGACTCACAG  |
| miR-185-5p RTP   | GTCGTATCCAGTGCAGGGTCCGAGGTATTTCGCACTGGATACGACTCAGGA  |
| miR-21-5p RTP    | GTCGTATCCAGTGCAGGGTCCGAGGTATTTCGCACTGGATACGACTCAACA  |
| miR-423-3p RTP   | GTCGTATCCAGTGCAGGGTCCGAGGTATTTCGCACTGGATACGACACTGAG  |
| miR-7704 RTP     | GTCGTATCCAGTGCAGGGTCCGAGGTATTTCGCACTGGATACGACCACGTC  |
| miR-4497 RTP     | GTCGTATCCAGTGCAGGGTCCGAGGTATTTCGCACTGGATACGACGCCAG   |
| miR-3182 RTP     | GTCGTATCCAGTGCAGGGTCCGAGGTATTTCGCACTGGATACGACGACTAC  |
| miR-193a-5p RTP  | GTCGTATCCAGTGCAGGGTCCGAGGTATTTCGCACTGGATACGACTCATCT  |
| miR-1273g-3p RTP | GTCGTATCCAGTGCAGGGTCCGAGGTATTTCGCACTGGATACGACCTCAGG  |
| miR-144-5p RTP   | GTCGTATCCAGTGCAGGGTCCGAGGTATTTCGCACTGGATACGACCTTACA  |
| miR-1-3p RTP     | GTCGTATCCAGTGCAGGGTCCGAGGTATTTCGCACTGGATACGACATACAT  |
| miR-486-5p RTP   | GTCGTATCCAGTGCAGGGTCCGAGGTATTTCGCACTGGATACGACCTCGGG  |
| miR-181b-5p RTP  | GTCGTATCCAGTGCAGGGTCCGAGGTATTTCGCACTGGATACGACACCCAC  |
| Universal PCR    | GTGCAGGGTCCGAGGT                                     |
| Primer           |                                                      |
| U6 RTP           | GCTTCACGAATTTGCGTGTCAT                               |
| U6 F             | GCTTCGGCAGCACATATACTAAA                              |
| U6 R             | GCTTCACGAATTTGCGTGTCAT                               |
| let-7a-5p F      | CGGGCTGAGGTAGTAGTTGT                                 |
| miR-125a-5p F    | CCCTCCCTGAGACCCCTTTAAC                               |
| miR-185-5p F     | GGGTGGAGAGAAAGGCAGT                                  |
| miR-21-5p F      | CCGCCTAGCTTATCAGACTGA                                |
| miR-423-3p F     | TTAGCTCGGTCTGAGGCC                                   |
| miR-7704 F       | AATTACGGGGTTCGGCGGC                                  |
| miR-4497 F       | AATTTGGCTCCGGGACGG                                   |
| miR-3182 F       | GTGGCCCGCTTCTGTAGT                                   |
| miR-193a-5p F    | AATGGGTCTTTGCGGGCG                                   |
| miR-1273g-3p F   | GTCCACCACTGCACTCCAG                                  |
| miR-144-5p F     | TTAGGATATCATATATAC                                   |
| miR-1-3p F       | CCGTGGAATGTAAAGAAGT                                  |
| miR-486-5p F     | TCCTGTA CTGAGCTGCC                                   |
| miR-181b-5p F    | CAACATTCATTGCTGTCGGT                                 |

\* RTP: reverse transcription primer; F: forward primer; R: reverse primer

Supplemental Table2 The differentially expressed miRNAs in plasma vs supernatant and in supernatant vs exosome by sequencing

|                        | miRNA            | log <sub>2</sub> (fold change) | p-value |
|------------------------|------------------|--------------------------------|---------|
| plasma vs supernatant  | hsa-miR-1246     | 3.48                           | 0.0010  |
|                        | hsa-miR-151a-5p  | 3.30                           | 0.0207  |
|                        | hsa-miR-16-2-3p  | -2.25                          | 0.0366  |
|                        | hsa-miR-199a-5p  | 2.15                           | 0.0157  |
|                        | hsa-miR-3182     | 2.57                           | 0.0005  |
|                        | hsa-miR-4433b-5p | -2.56                          | 0.0330  |
|                        | hsa-miR-4446-3p  | -2.20                          | 0.0018  |
|                        | hsa-miR-4497     | 3.41                           | 0.0002  |
|                        | hsa-miR-7641     | -2.15                          | 0.0006  |
|                        | hsa-miR-7704     | 2.94                           | 0.0009  |
| supernatant vs exosome | hsa-miR-1273g-3p | 2.78                           | 0.0170  |
|                        | hsa-miR-193a-5p  | 2.69                           | 0.0215  |
